# Supplementary material for: Population Pharmacokinetics of a Novel Oral Fosfomycin Prophylactic Scheme in the Plasma and Prostate of Patients Undergoing Endoscopic Surgery for Benign Prostatic Hyperplasia
Source: Springer Nature journal article supplement (doi:10.1007/s40262-025-01586-1), 2025-11-03
Supplement: MOESM1 [file 40262_2025_1586_MOESM1_ESM.docx]

**Clinical Pharmacokinetics**

**Supplementary Material**

**Fosfomycin dosing for oral prophylaxis against Gram-negative *Enterobacterales* in patients undergoing surgical intervention for benign prostatic hyperplasia**

Pier Giorgio Cojutti, Pasquale Maria Berrino, Valeria Rotaru, Lorenzo Bianchi, Riccardo Schiavina, Eugenio Brunocilla, Pierluigi Vialeand Federico Pea

| **Table S1**. Comparison of different base direct response models according to the greatest reduction in OFV and AIC, the adequacy of pc-VPC and plausibility of parameter estimates. | | | | | | |
| --- | --- | --- | --- | --- | --- | --- |
| Model number | Model Structure | Estimated Parameters | OFV | AIC | pc-VPC | Additional comments |
| 1 | 1-compartment, proportional | ka, V, Cl, PR | 1314.75 | 1334.75 | Inadequate | RSE% ka 58.9 |
| 2 | 1-compartment, power | ka, V, Cl, PR, POW | 1305.44 | 1329.44 | Inadequate | ka 526.5; CV% ωka 2884; RSE% ka 233, a_prost 88.5 |
| 3 | 1-compartment,  saturable | ka, V, Cl, Emax, Km | 1327.22 | 1351.22 | Inadequate | RSE% ka 61.2; CV% ωka 340.22 |
| 4 | 1-compartment, proportional, ka-fixed | V, Cl, PR | 1319.45 | 1335.45 | Inadequate |  |
| **5** | **1-compartment, power, ka-fixed** | **V, Cl, PR, POW** | **1314.25** | **1334.25** | **Adequate** |  |
| 6 | 1-compartment,  saturable,  ka-fixed | V, Cl, Emax, Km | 1316.35 | 1338.35 | Inadequate | RSE% a_prost 81.6 |
| 7 | 2-compartment, proportional | ka, Cl, V1, V2, Q, PR | 1312.17 | 1340.17 | Inadequate | RSE% on Q 363, V2 75; CV% ωV1 912, ωQ >1000, ωV2 386 |
| 8 | 2-compartment, power | ka, Cl, V1, V2, Q, PR, POW | 1310.14 | 1342.124 | Adequate | RSE% on V1 164, Q 144, V2 Nan; CV% ωV1 >1000, ωQ 734, ωV >1000 |
| 9 | 2-compartment,  saturable | ka, Cl, V1, V2, Q, Emax, Km | 1376.24 | 1408.24 | Inadequate | RSE% on V1 176, Q 184, V2 NaN, Km 220; CV% ωV1 >1000, ωQ >1000, ωV2 467, ωKm >1000 |
| 10 | 2-compartment, proportional, ka-fixed | ka, Cl, V1, V2, Q, PR | 1314.38 | 1338.38 | Inadequate | RSE% on CL 105, V1 289, Q 107; CV% ωV1 591, ωQ 449 |
| 11 | 2-compartment, power, ka-fixed | ka, Cl, V1, V2, Q, PR, POW | 1334.9 | 1362.9 | Inadequate | RSE% on CL 50.7, Q 333; CV% ωCl 231.7, ωQ >1000 |
| 12 | 2-compartment,  saturable, ka-fixed | ka, Cl, V1, V2, Q, Emax, Km | 1384.73 | 1412.73 | Adequate | RSE% on Q 1340, V2 992, Km 1230 ; CV% ωQ >1000, ωV2 457, ωKm >1000 |

| **Table S2.** Univariate analysis to identify significant covariates of CL and V applied to model 5 | | | | | | | |
| --- | --- | --- | --- | --- | --- | --- | --- |
| CL | Coefficient | Statistics | p-value | V | Coefficient | Statistics | p-value |
| Age | -0.032 | -0.33 | 7.45e-1 | Age | -0.0067 | -0.068 | 9.46e-1 |
| BMI | 0.095 | 0.96 | 3.39e-1 | BMI | 0.092 | 0.93 | 3.53e-1 |
| S-Cr | 0.18 | 1.89 | 6.19e-2 | S-Cr | 0.024 | 0.24 | 8.07e-1 |
| eGFR | -0.15 | -1.52 | 1.32e-1 | eGFR | -0.015 | -0.15 | 8.78e-1 |
| Height | -0.013 | -0.14 | 8.92e-1 | Height | 0.11 | 1.08 | 2.83e-1 |
| Weight | 0.18 | 1.83 | 7.09e-2 | Weight | 0.31 | 3.28 | **1.42e-3** |
| PSA | 0.023 | 0.23 | 8.19e-1 | PSA | 0.079 | 0.8 | 4.26e-1 |
| Prost_Vol | -0.055 | -0.56 | 5.77e-1 | Prost_Vol | -0.032 | -0.32 | 7.46e-1 |
| BMI, body mass index; eGFR, estimated glomerular filtration rate; PSA prostatic specific antigen; Prost_Vol, prostatic volume; S-Cr, serum creatinine | | | | | | | |

| **Table S3.** Comparison of base model vs. model with V parameterized by weight, applied to model 5 | | | | | | | | |
| --- | --- | --- | --- | --- | --- | --- | --- | --- |
|  | **Base Model** | | | | **Model with Weight on V** | | | |
| **Fixed Effects** | | | | |  | |  |  |
|  | Value | | S.E. | R.S.E.(%) | Value | | S.E. | R.S.E.(%) |
| ka | 0.92 | | - | - | 0.92 | | - | - |
| V | 260.22 | | 35.52 | 13.7 | 60.86 | | 26.85 | 44.1 |
| β_V_weight | - | | - | - | 0.02 | | 0.0054 | 26.9 |
| CL | 17.24 | | 2.07 | 12.0 | 14.68 | | 2.11 | 14.4 |
| PR | 0.67 | | 0.07 | 10.4 | 0.26 | | 0.019 | 7.09 |
| POW | 1.18 | | 0.043 | 3.63 | 1.57 | | 0.028 | 1.80 |
| **Standard Deviation of the Random Effects** | | | | |  | |  |  |
|  | Value | C.V.(%) | S.E. | R.S.E.(%) | Value | C.V.(%) | S.E. | R.S.E.(%) |
| ω_ka | 1.09 | 151.02 | - | - | 1.09 | 151.02 | - | - |
| ω_V | 0.64 | 71.82 | 0.097 | 15.0 | 0.38 | 39.52 | 0.068 | 17.8 |
| ω_CL | 0.52 | 55.95 | 0.083 | 15.9 | 0.76 | 87.86 | 0.094 | 12.4 |
| ω_PR | 0.25 | 25.01 | 0.08 | 32.3 | 0.42 | 44.27 | 0.05 | 11.8 |
| ω_POW | 0.16 | 15.85 | 0.029 | 18.5 | 0.095 | 9.5 | 0.015 | 15.4 |
| **Error Model Parameters** | | | | |  | |  |  |
| a_serum | 1.34 | | 0.40 | 29.8 | 1.35 | | 0.28 | 20.5 |
| a_prostate | 1.42 | | 0.43 | 30.3 | 1.01 | | 0.34 | 34.0 |
| **Estimated log-likelihood and information criteria** | | | | | | | | |
| OFV | 1314.25 | | | | 1308.76 | | | |
| AIC | 1334.25 | | | | 1330.76 | | | |

### **Figure S1**. Observed fosfomycin plasma and prostatic concentrations in the study population after two doses of 3g fosfomycin trometamol


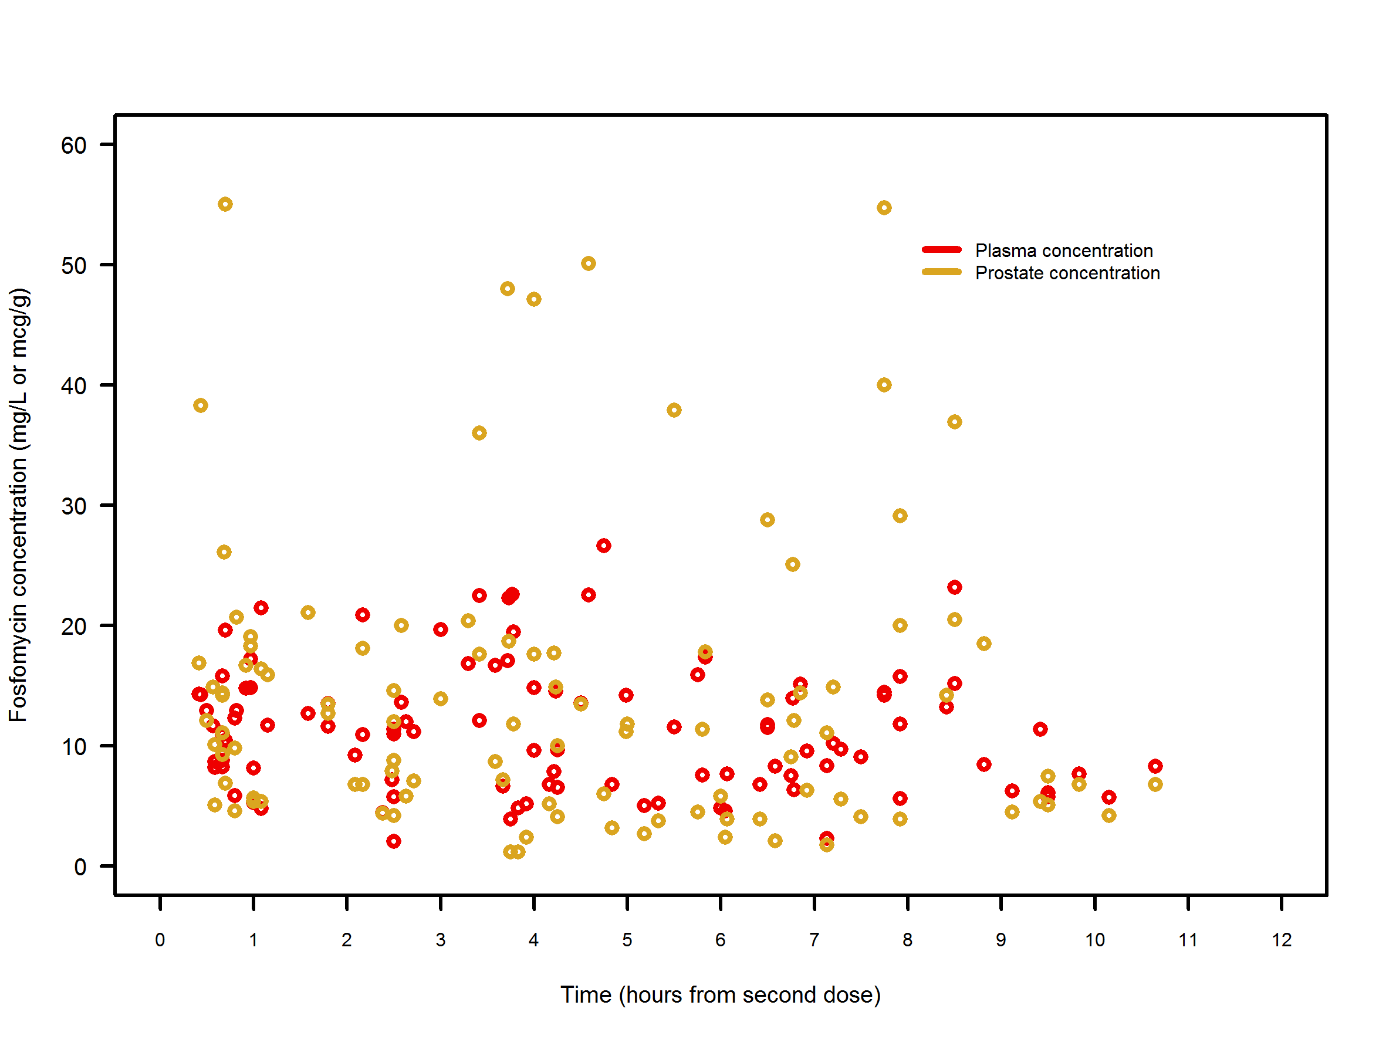


### **Figure S2**. Observed versus population and individual prediction plots of fosfomycin plasma and prostatic concentrations

Plasma

###
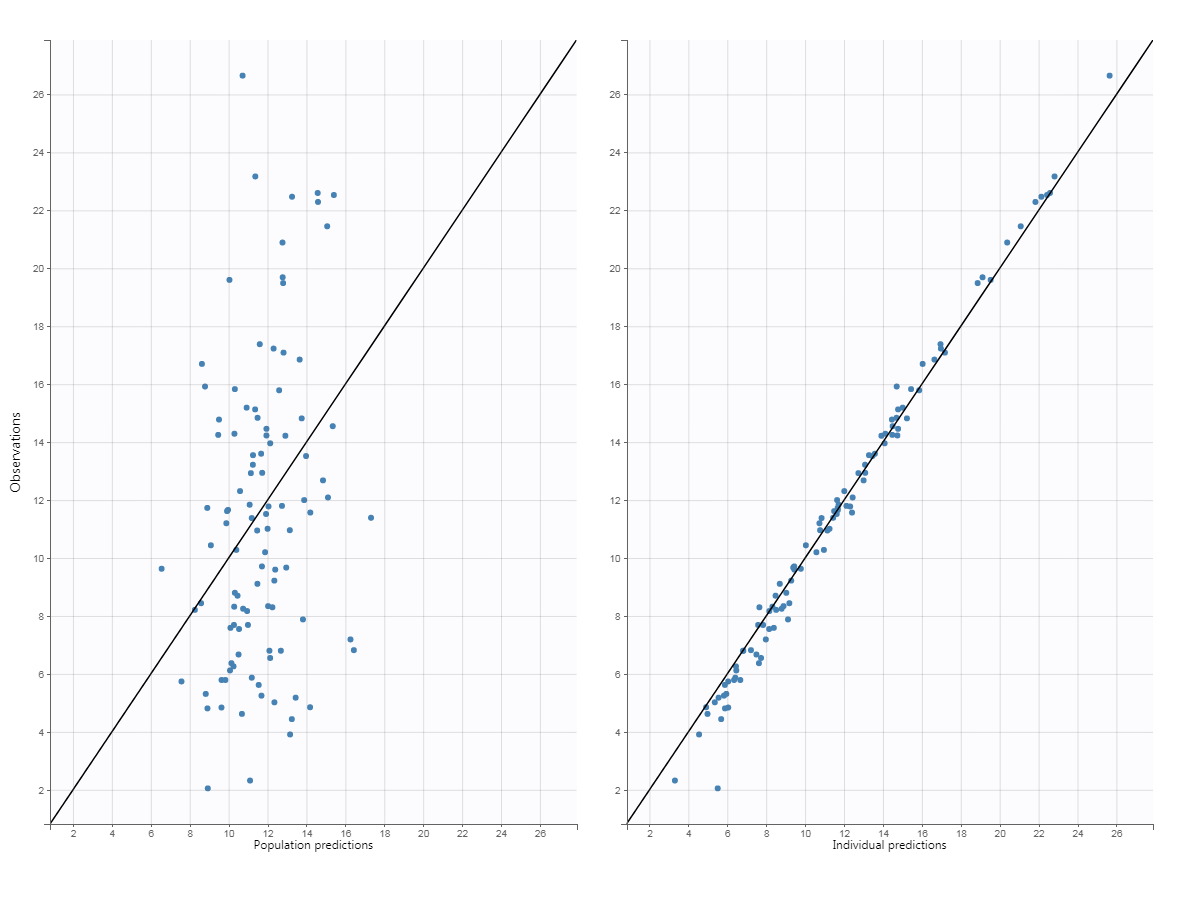


Prostate

**
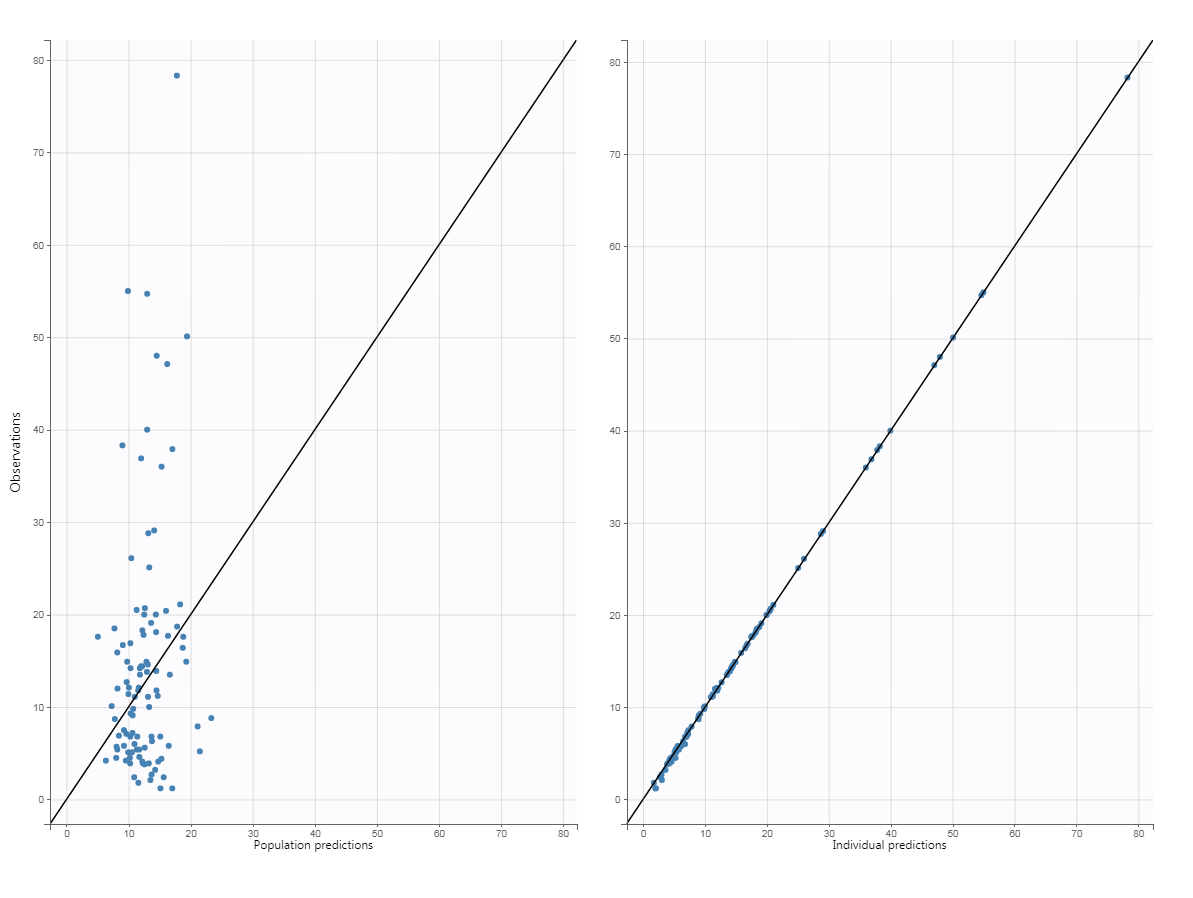
**

### **Figure S3.** Population weighted residuals, Individual weighted residuals, and normalized prediction distribution errors with spline plot over time and population and individual predictions (after the first dose administered at time=0h and the second dose administered at time=12h)

Plasma

**
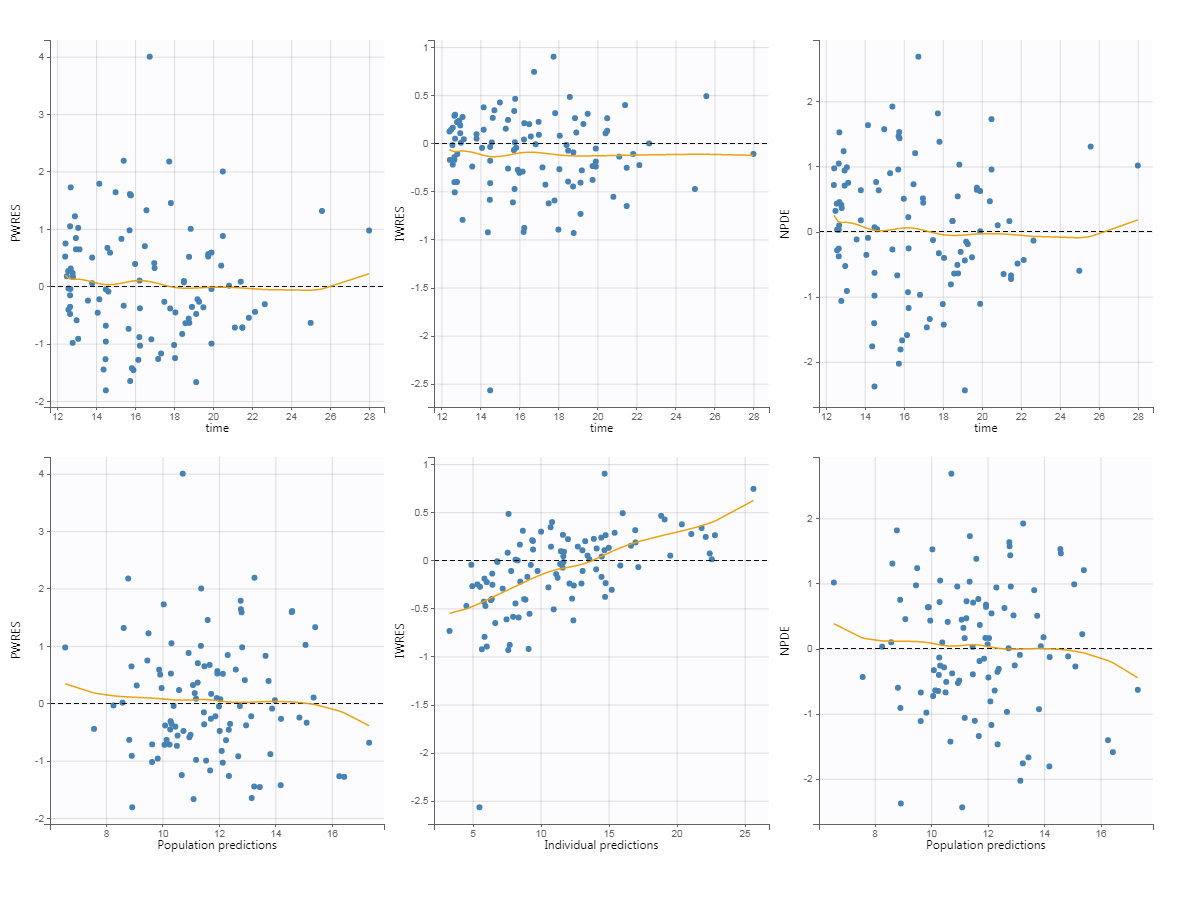
**

Prostate

**
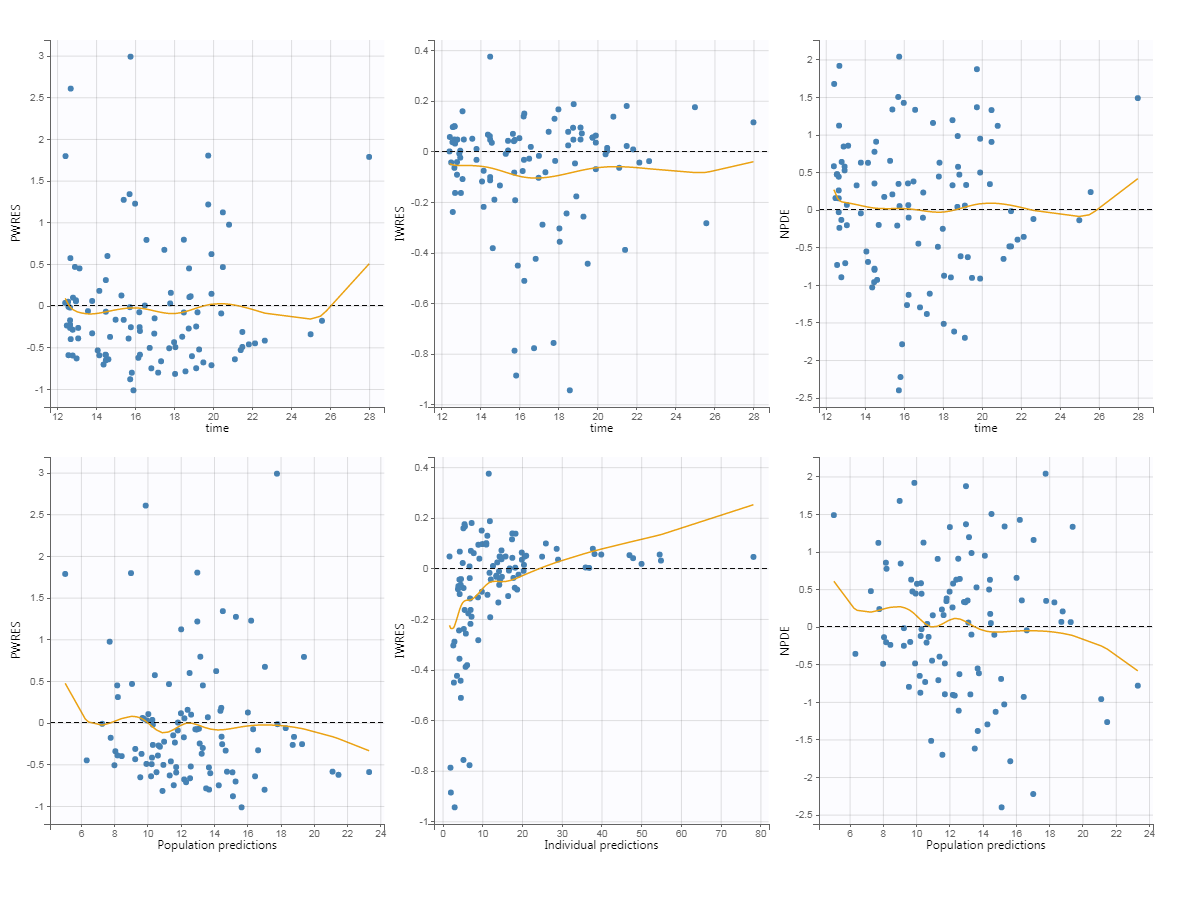
**

### **Figure S4.** Distribution of the residuals plot

Plasma


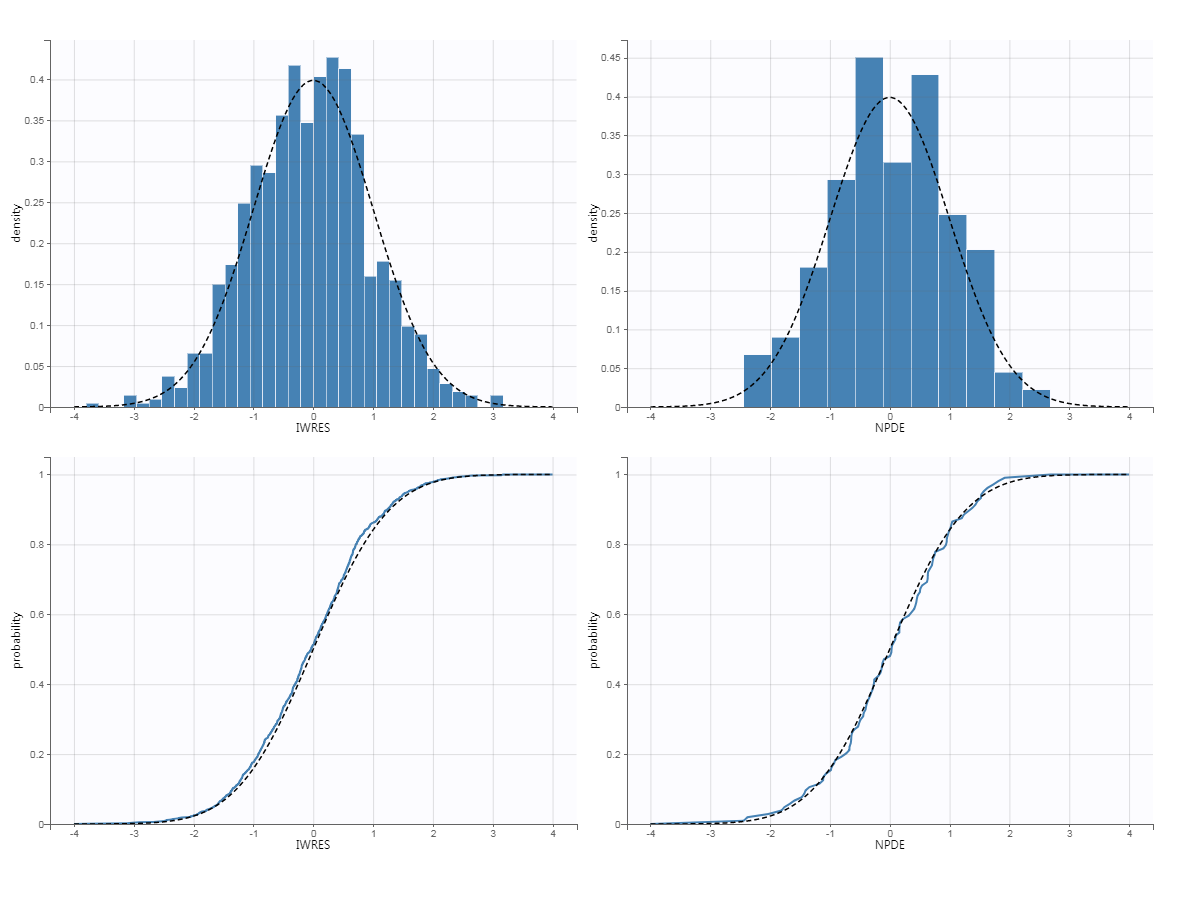


Prostate


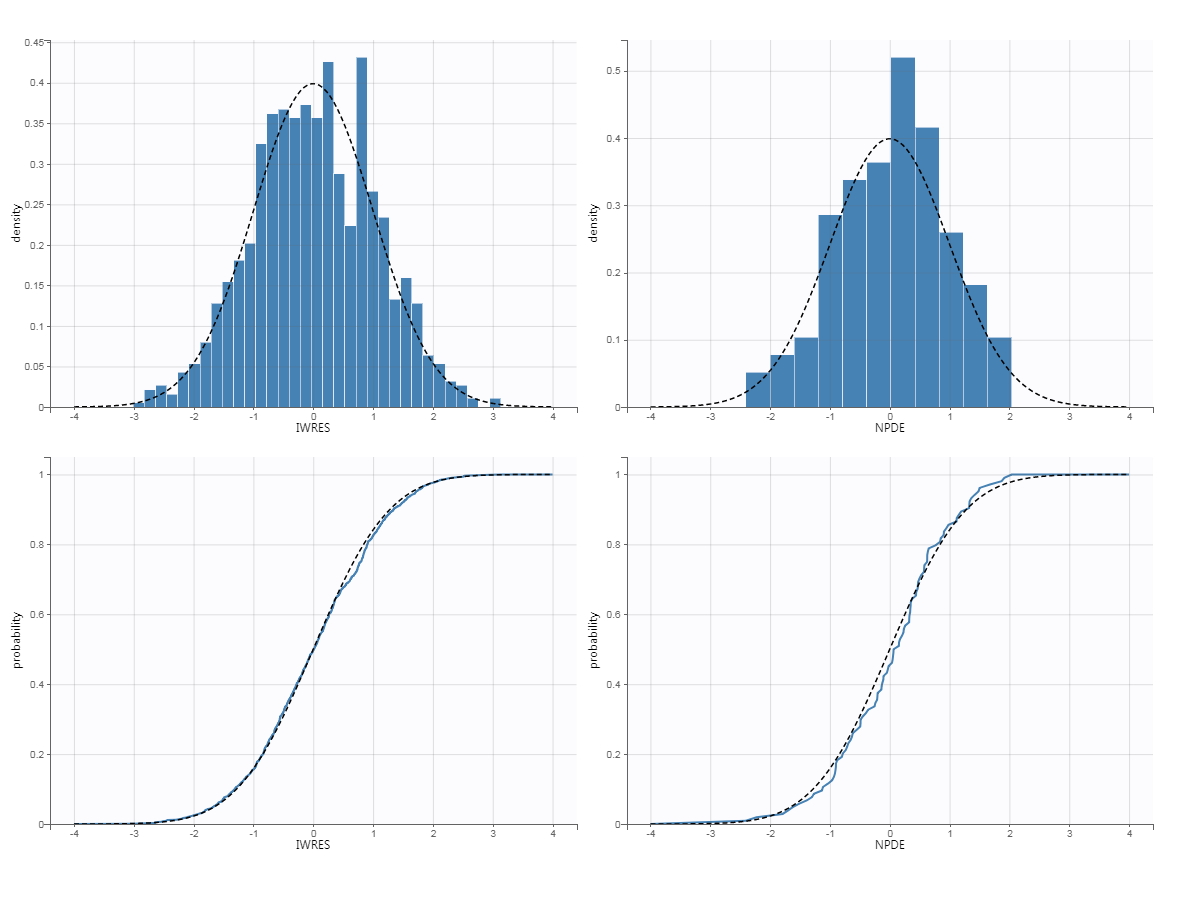


### **Figure S5.** Visual Predictive Check Plot with Observed Data (after the first dose administered at time=0h and the second dose administered at time=12h)

Plasma


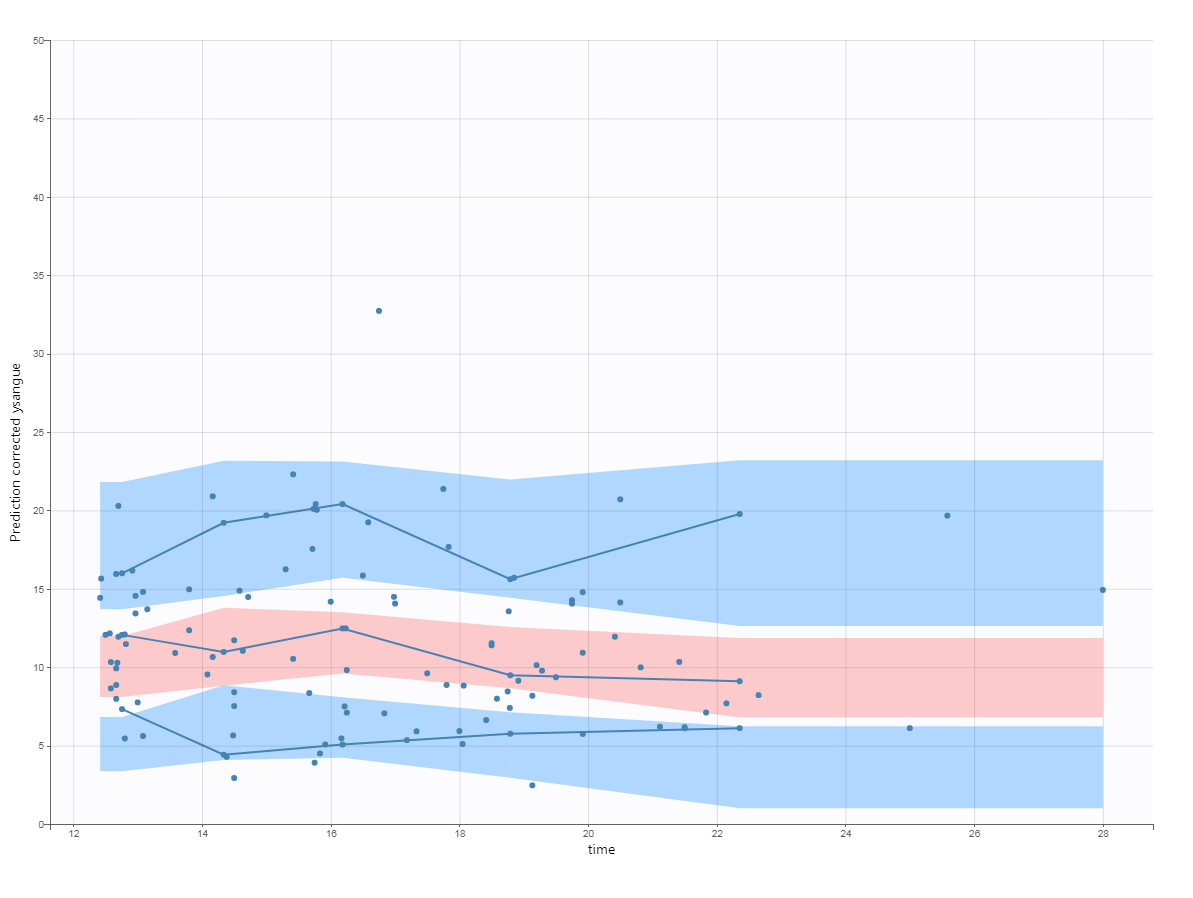


Prostate


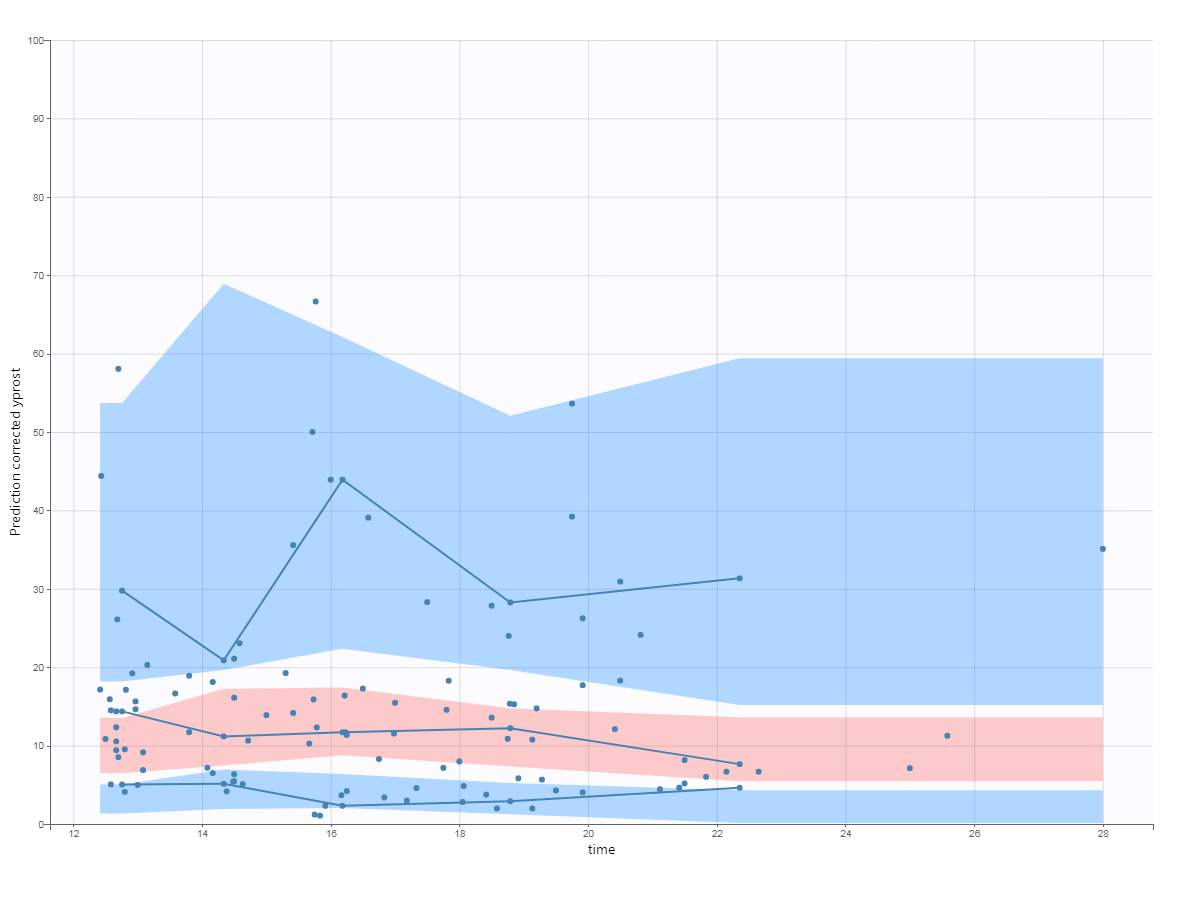


**Figure S6.** Concentration-time profiles of plasma individual predicted concentrations overlaid by the observed concentration for the first 20 patients included in the study

**
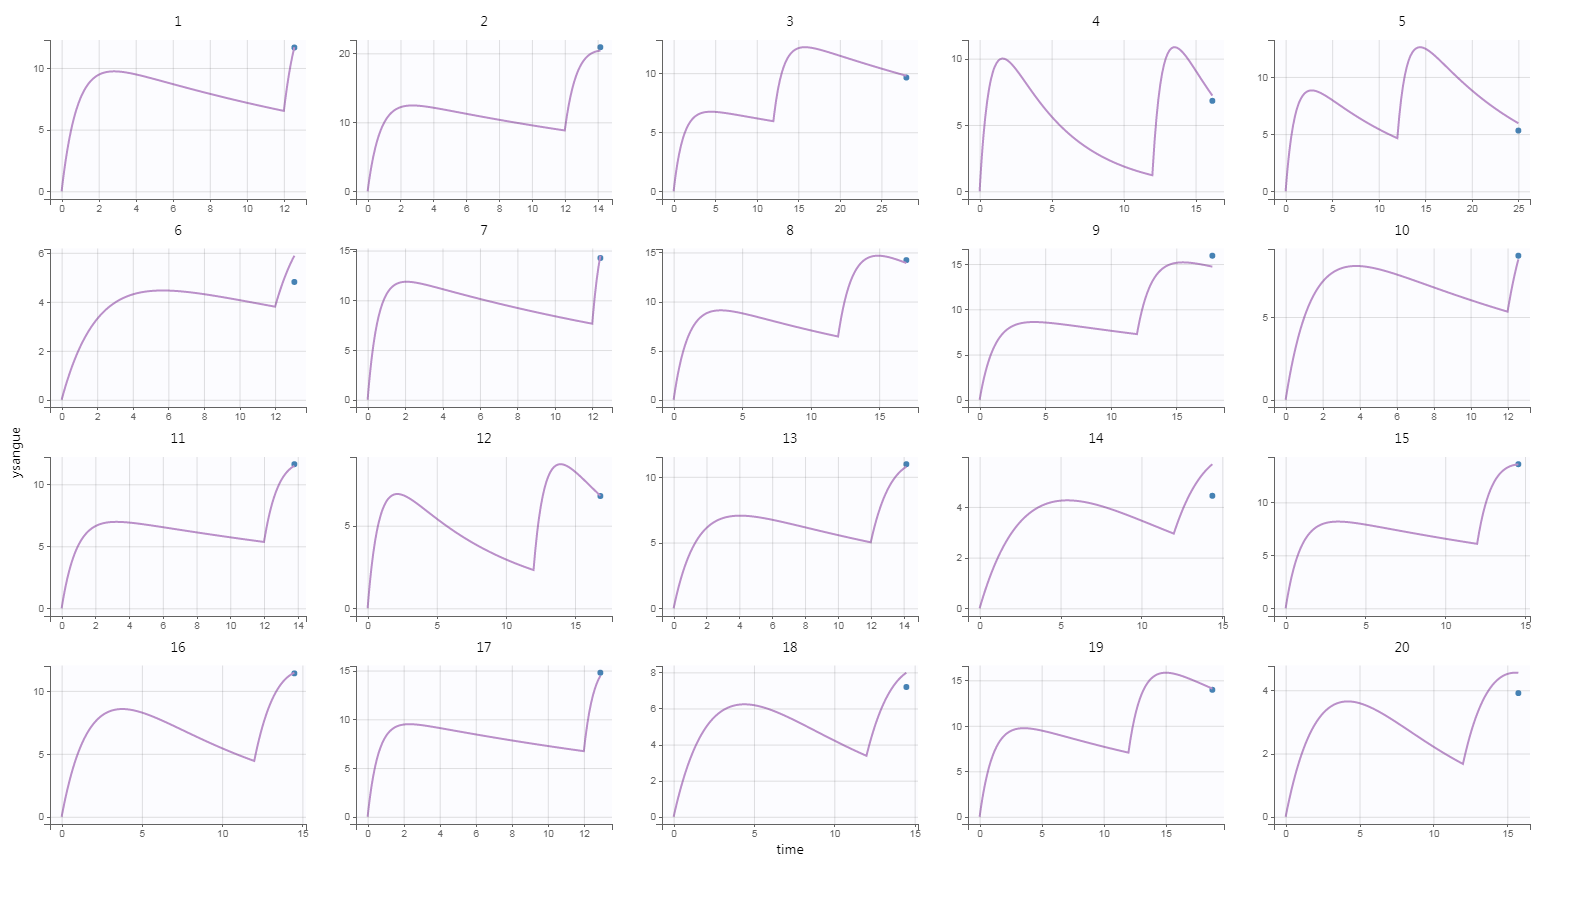
**

**Figure S7.** Concentration-time profiles of prostate individual predicted concentrations overlaid by the observed concentration for the first 20 patients included in the study


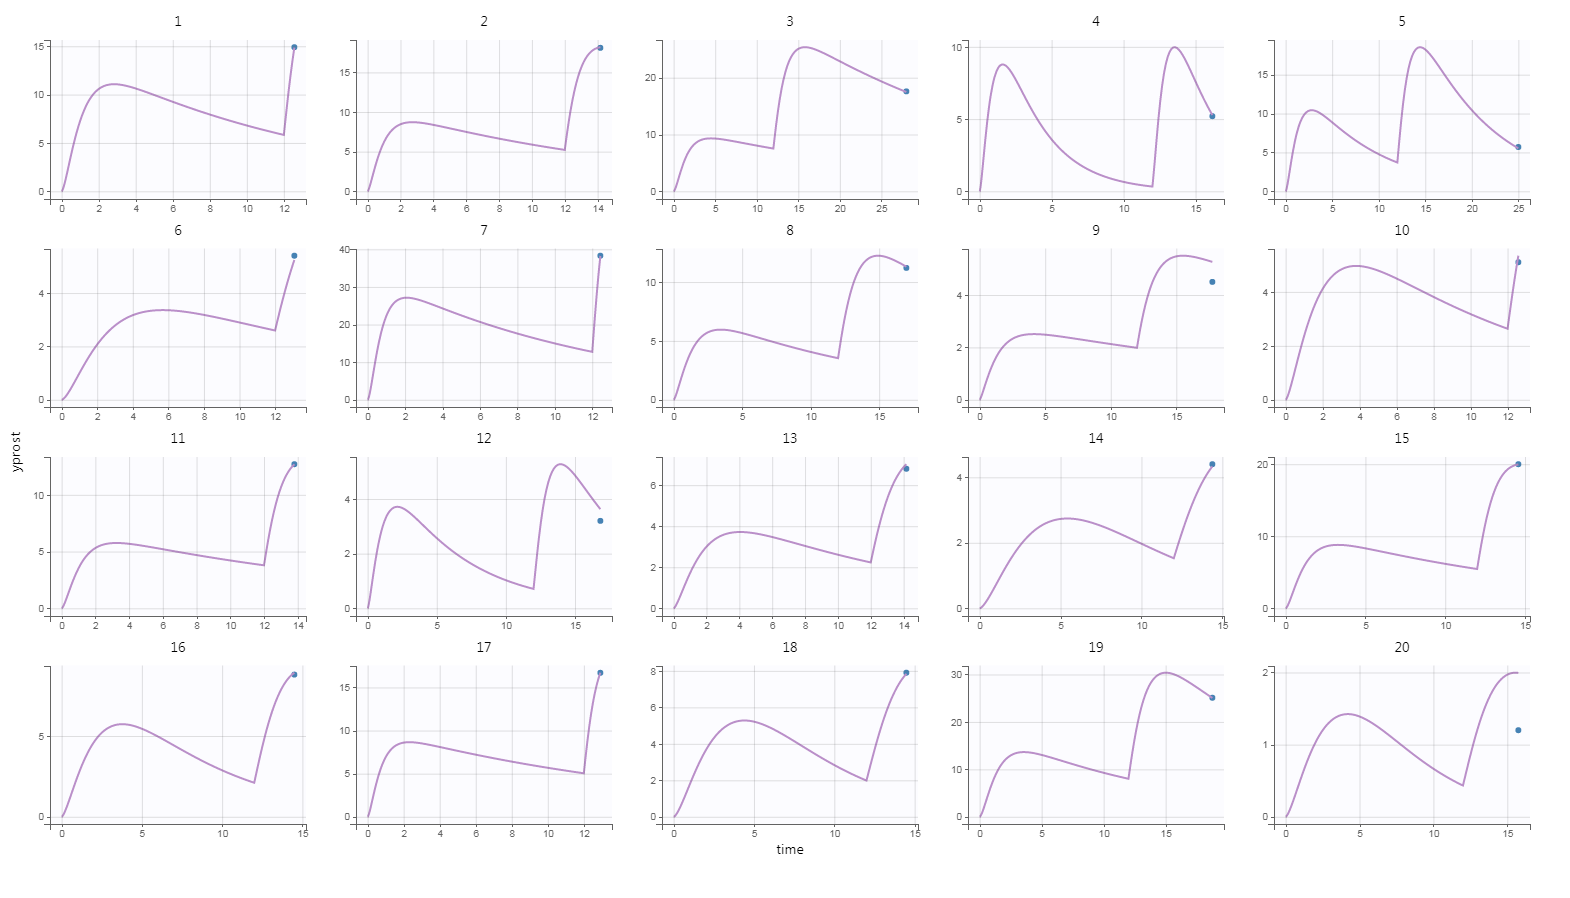


**Model Code (in mlxtran language)**

DESCRIPTION:

PKPD model. The PK data must be tagged with the lowest OBSERVATION ID value.

The administration is via a bolus.

The PK model has one compartment (volume V) and a linear elimination (clearance Cl).

The PD model is a direct Emax model (maximal effect Emax, and half-maximal effective concentration EC50).

[LONGITUDINAL]

input = {ka, V, Cl, PR, POW}

EQUATION:

Cc=pkmodel(ka,V,Cl)

Cp=PR*(Cc^POW)

;AUC calculation

ddt_AUC=Cp

OUTPUT:

output = {Cc, Cp}

table = {AUC}
